# Supplementary material
Source: PubMed Central journal article supplement (PMC7882398)
Supplement: NIHMS1653074-supplement-Supplementary_Figure_1.pdf [file NIHMS1653074-supplement-Supplementary_Figure_1.pdf]

Supplementary Figure 1: Heat map of 146 race-specific ETS-dependent genes differentially expressed based on biochemical recurrence (Validation cohort)

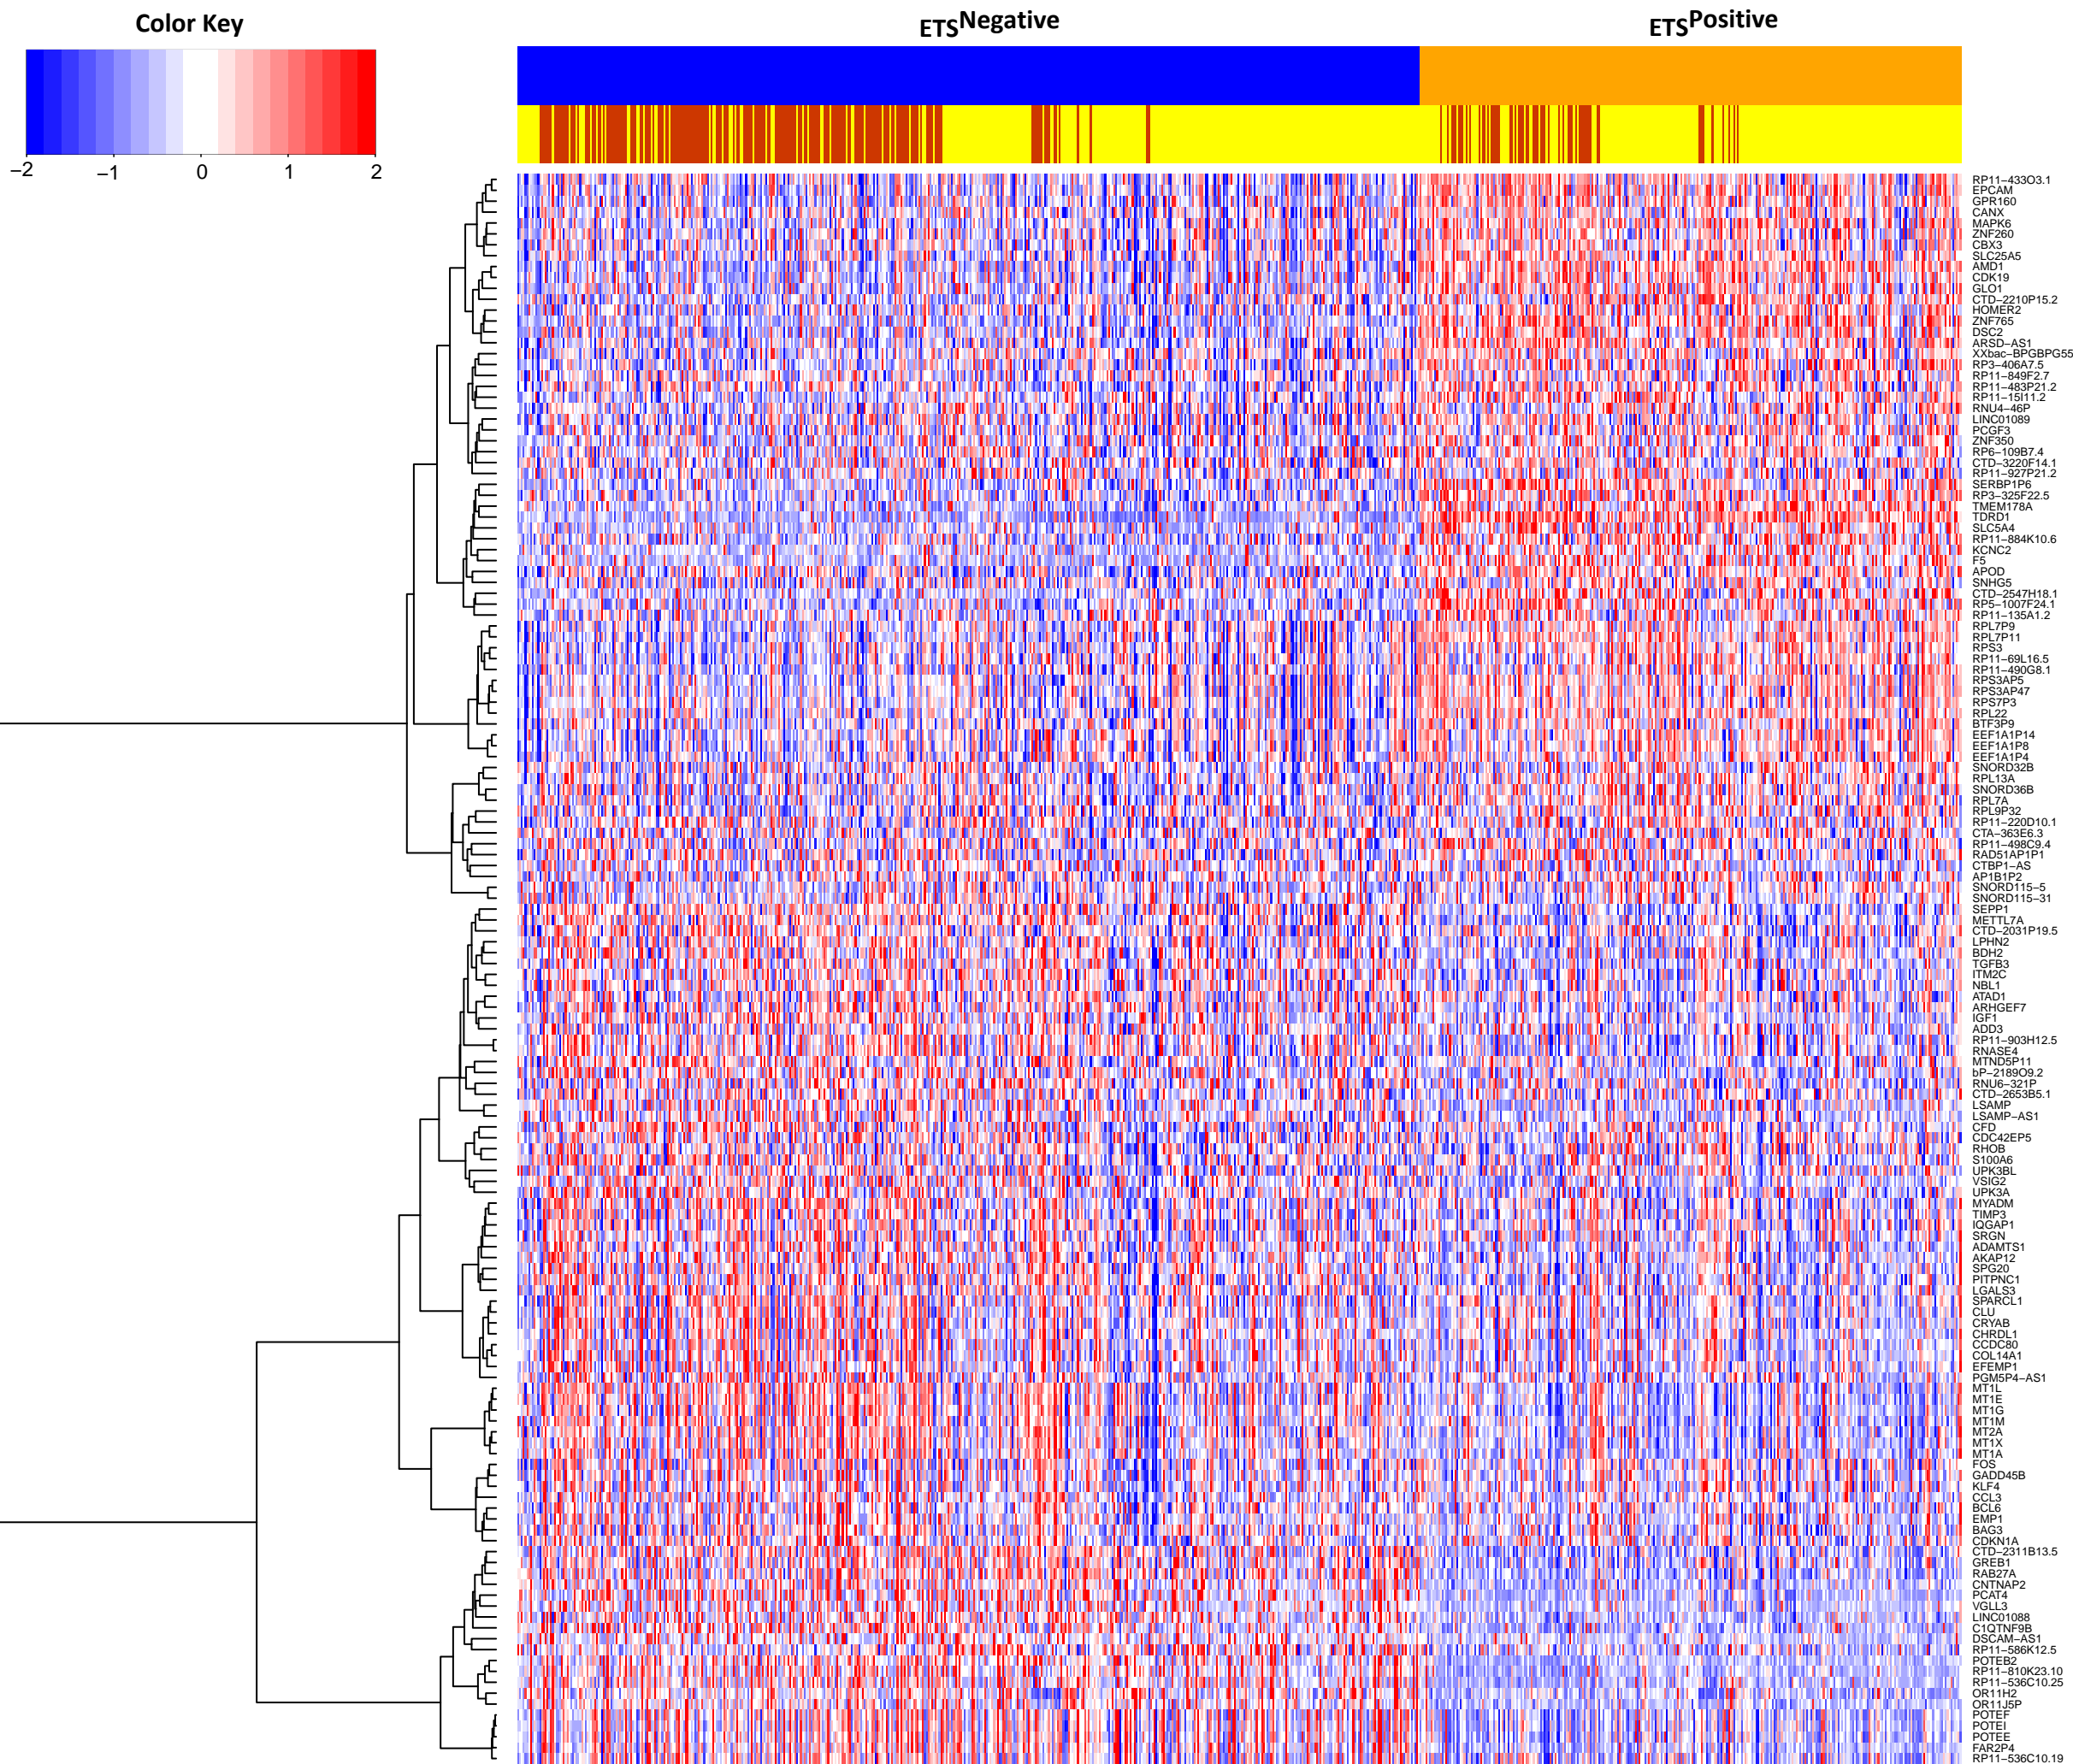

\*Maroon bar indicates AAM and yellow bar indicates EAM
