# Supplementary material
Source: PubMed Central journal article supplement (PMC7882398)
Supplement: NIHMS1653074-supplement-Supplementary_Table_1.pdf [file NIHMS1653074-supplement-Supplementary_Table_1.pdf]

**Supplementary Table 1: Clinico-pathologic characteristics by race in GRID validation cohort, n = 792**

| <b>Baseline Characteristics</b>                                                                                                                     | <b>AAM<br/>(n = 243)</b> | <b>WHITE<br/>(n = 549)</b> | <b>p value</b> |
|-----------------------------------------------------------------------------------------------------------------------------------------------------|--------------------------|----------------------------|----------------|
| <b>ETS Status</b>                                                                                                                                   |                          |                            |                |
| Negative                                                                                                                                            | 186 (76.5)               | 309 (56.3)                 | < 0.001        |
| Positive                                                                                                                                            | 57 (23.5)                | 240 (43.7)                 |                |
| <b>Pathology Gleason Score</b>                                                                                                                      |                          |                            |                |
| ≤ 3+3                                                                                                                                               | 20 (2.5)                 | 61 (11.1)                  | < 0.001        |
| 3+4                                                                                                                                                 | 152 (62.5)               | 202 (36.8)                 |                |
| 4+3                                                                                                                                                 | 39 (16.0)                | 106 (19.3)                 |                |
| ≥ 8                                                                                                                                                 | 32 (13.2)                | 178 (32.4)                 |                |
| Unknown                                                                                                                                             | 0                        | 2 (0.4)                    |                |
| <b>iPSA (ng/ml)</b>                                                                                                                                 |                          |                            |                |
| ≤ 6                                                                                                                                                 | 101 (41.6)               | 133 (24.2)                 | < 0.001        |
| > 6 - 10                                                                                                                                            | 59 (24.3)                | 141 (25.7)                 |                |
| > 10 - 20                                                                                                                                           | 38 (15.6)                | 94 (17.1)                  |                |
| > 20                                                                                                                                                | 20 (8.2)                 | 72 (13.1)                  |                |
| Unknown                                                                                                                                             | 25 (3.2)                 | 109 (19.8)                 |                |
| <b>Surgical Margins</b>                                                                                                                             |                          |                            |                |
| Present                                                                                                                                             | 114 (46.9)               | 252 (45.9)                 | 0.7            |
| Absent                                                                                                                                              | 129 (53.1)               | 297 (54.1)                 |                |
| <b>Extracapsular Extension</b>                                                                                                                      |                          |                            |                |
| Yes                                                                                                                                                 | 54 (6.8)                 | 248 (45.2)                 | < 0.001        |
| No                                                                                                                                                  | 189 (77.8)               | 298 (54.3)                 |                |
| Unknown                                                                                                                                             | 0                        | 3 (0.5)                    |                |
| <b>Lymph Node Invasion</b>                                                                                                                          |                          |                            |                |
| Yes                                                                                                                                                 | 2 (0.8)                  | 59 (10.7)                  | < 0.001        |
| No                                                                                                                                                  | 240 (98.8)               | 469 (85.4)                 |                |
| Unknown                                                                                                                                             | 1 (0.4)                  | 21 (3.8)                   |                |
| <b>Seminal Vesical Invasion</b>                                                                                                                     |                          |                            |                |
| Yes                                                                                                                                                 | 25 (10.3)                | 150 (27.3)                 | < 0.001        |
| No                                                                                                                                                  | 218 (89.7)               | 399 (72.7)                 |                |
| <b>CAPRA-S Score</b>                                                                                                                                |                          |                            |                |
| 0 - 2                                                                                                                                               | 77 (31.7)                | 43 (7.8)                   | < 0.001        |
| 3 - 5                                                                                                                                               | 91 (37.4)                | 208 (37.9)                 |                |
| 6 - 12                                                                                                                                              | 50 (20.6)                | 184 (33.5)                 |                |
| Unknown                                                                                                                                             | 25 (10.3)                | 114 (20.8)                 |                |
| <b>Age at Diagnosis (Years)</b>                                                                                                                     |                          |                            |                |
| ≤ 50                                                                                                                                                | 15 (6.2)                 | 37 (6.7)                   | 0.05           |
| > 50 - 65                                                                                                                                           | 128 (52.7)               | 334 (60.8)                 |                |
| > 65                                                                                                                                                | 100 (41.1)               | 178 (32.4)                 |                |
| <b>Abbreviations:</b> AAM, African American; iPSA, Preoperative Prostate Specific Antigen; CAPRA-S, Cancer of the Prostate Risk Assessment Surgical |                          |                            |                |
