# Supplementary material
Source: PubMed Central journal article supplement (PMC7882398)
Supplement: NIHMS1653074-supplement-Supplementary_Table_2.pdf [file NIHMS1653074-supplement-Supplementary_Table_2.pdf]

| Gene Symbol    | Median_A<br>AM | Median_E<br>AM | <i>q</i> | log2 FC |
|----------------|----------------|----------------|----------|---------|
| <i>AMACR</i>   | 0.846          | 1.181          | 0.00043  | 0.335   |
| <i>AMD1</i>    | 1.104          | 1.383          | 0.00209  | 0.279   |
| <i>ANPEP</i>   | 0.756          | 0.288          | 1.11E-05 | 0.468   |
| <i>CACNA1D</i> | 0.258          | 0.457          | 1.09E-05 | 0.199   |
| <i>CCL3</i>    | 0.368          | 0.243          | 0.00065  | 0.125   |
| <i>CRISP3</i>  | 0.052          | 0.176          | 0.00015  | 0.124   |
| <i>ERG</i>     | 0.201          | 0.312          | 0.00658  | 0.111   |
| <i>HPGD</i>    | 0.205          | 0.102          | 1.94E-05 | 0.103   |
| <i>INPP4B</i>  | 0.212          | 0.141          | 3.16E-05 | 0.071   |
| <i>LSAMP</i>   | 0.23           | 0.15           | 0.00346  | 0.08    |
| <i>PCGEM1</i>  | 1.06           | 0.707          | 6.97E-05 | 0.353   |
| <i>SPINK1</i>  | 0.115          | 0.016          | 0.00042  | 0.099   |
| AC006449.2     | 1.235          | 1.418          | 0.00287  | 0.183   |
| AC008592.3     | 1.012          | 1.195          | 0.00529  | 0.183   |
| AC008746.12    | 0.87           | 1.102          | 4.98E-05 | 0.232   |
| AC009245.3     | 1.675          | 1.815          | 0.00322  | 0.14    |
| AC016700.6     | 1.644          | 1.754          | 0.00625  | 0.11    |
| AC092610.12    | 0.995          | 1.063          | 0.00541  | 0.068   |
| AC092667.2     | 0.176          | 0.101          | 0.00036  | 0.075   |
| AC144450.2     | 0.151          | 0.309          | 0.00077  | 0.158   |
| ADAMTS1        | 0.609          | 0.446          | 0.0001   | 0.163   |
| ADD3           | 0.251          | 0.193          | 0.00116  | 0.058   |
| AFF3           | 0.56           | 0.377          | 3.00E-05 | 0.183   |
| AGR2           | 0.797          | 1.055          | 0.01581  | 0.258   |
| AKAP12         | 0.349          | 0.269          | 0.00267  | 0.08    |
| ANKRD20A11P    | 0.132          | 0.068          | 3.16E-05 | 0.064   |
| ANKRD20A5P     | 0.206          | 0.12           | 4.04E-05 | 0.086   |
| ANKRD20A9P     | 0.025          | -0.058         | 5.24E-07 | 0.083   |
| AP000281.1     | 0.033          | 0.292          | 4.93E-19 | 0.259   |
| AP001627.1     | 0.106          | 0.241          | 4.98E-05 | 0.135   |
| AP1B1P2        | 0.121          | 0.187          | 0.01494  | 0.066   |
| APOD           | 1.472          | 1.357          | 0.00897  | 0.115   |
| ARHGEF7        | 0.458          | 0.404          | 0.0143   | 0.054   |
| ARL17B         | 0.743          | 0.865          | 0.00024  | 0.122   |
| ARSD.AS1       | 1.372          | 1.604          | 0.00027  | 0.232   |
| ATAD1          | 0.537          | 0.473          | 0.02148  | 0.064   |
| ATP11B         | 0.622          | 0.706          | 0.00042  | 0.084   |
| BAG3           | 0.496          | 0.444          | 0.02288  | 0.052   |
| BCAM           | 0.554          | 0.627          | 0.01511  | 0.073   |
| BCL6           | 0.355          | 0.276          | 0.0075   | 0.079   |
| BDH2           | 0.231          | 0.164          | 0.00569  | 0.067   |
| BMPR1B.AS1     | 0.094          | 0.164          | 0.01586  | 0.07    |
| bP.218909.2    | 0.492          | 0.362          | 0.00784  | 0.13    |
| BTF3P9         | 0.972          | 1.055          | 0.01628  | 0.083   |
| C1orf21        | 1.04           | 0.974          | 0.02288  | 0.066   |
| C1QTNF3.AMACR  | 0.507          | 0.732          | 0.00036  | 0.225   |
| C1QTNF9B       | 0.169          | 0.048          | 0.00054  | 0.121   |
| C1QTNF9B.AS1   | 0.555          | 0.211          | 1.17E-05 | 0.344   |

|                |        |       |          |       |
|----------------|--------|-------|----------|-------|
| C9orf129       | 0.832  | 0.896 | 0.01045  | 0.064 |
| CANT1          | 0.316  | 0.377 | 0.02299  | 0.061 |
| CANX           | 2.137  | 2.238 | 0.0127   | 0.101 |
| CBX3           | 0.824  | 0.885 | 0.01709  | 0.061 |
| CCDC80         | 0.405  | 0.327 | 0.01385  | 0.078 |
| CD24           | 2.235  | 2.611 | 0.00091  | 0.376 |
| CDC42EP5       | 0.847  | 0.772 | 0.01388  | 0.075 |
| CDK19          | 0.464  | 0.617 | 0.00221  | 0.153 |
| CDKN1A         | 0.118  | 0.054 | 0.01163  | 0.064 |
| CFD            | 0.981  | 0.839 | 0.00494  | 0.142 |
| CHDH           | 0.132  | 0.19  | 0.00145  | 0.058 |
| CHRD1          | 0.217  | 0.158 | 0.00068  | 0.059 |
| CHRM3.AS2      | 0.155  | 0.295 | 0.00042  | 0.14  |
| CLU            | 0.482  | 0.403 | 0.01861  | 0.079 |
| CNTNAP2        | 0.131  | 0.071 | 0.00781  | 0.06  |
| COL14A1        | 0.301  | 0.228 | 0.00777  | 0.073 |
| CRIPAK         | 1.251  | 1.353 | 0.00711  | 0.102 |
| CRYAB          | 0.799  | 0.736 | 0.02126  | 0.063 |
| CSGALNACT1     | 0.291  | 0.452 | 6.33E-06 | 0.161 |
| CTA.363E6.3    | 0.079  | 0.205 | 0.00577  | 0.126 |
| CTBP1.AS       | 0.336  | 0.261 | 0.01163  | 0.075 |
| CTD.2031P19.5  | 1.249  | 1.161 | 0.01991  | 0.088 |
| CTD.2210P15.2  | -0.079 | 0.007 | 0.01629  | 0.086 |
| CTD.2311B13.5  | 1.964  | 1.558 | 0.01861  | 0.406 |
| CTD.2547H18.1  | 0.266  | 0.346 | 0.0143   | 0.08  |
| CTD.2583A14.11 | 1.256  | 1.362 | 0.00394  | 0.106 |
| CTD.2653B5.1   | 0.385  | 0.301 | 0.01376  | 0.084 |
| CTD.3220F14.1  | 0.364  | 0.423 | 0.00981  | 0.059 |
| CYP4F27P       | 0.609  | 0.294 | 0.00042  | 0.315 |
| CYP4F30P       | 3.453  | 2.563 | 0.0041   | 0.89  |
| CYP4F35P       | 0.2    | 0.145 | 0.00029  | 0.055 |
| CYP4F62P       | 1.124  | 0.776 | 0.0016   | 0.348 |
| DNASE2B        | 0.031  | 0.099 | 0.0009   | 0.068 |
| DSC2           | 0.337  | 0.414 | 0.01147  | 0.077 |
| DSCAM.AS1      | 0.058  | 0.002 | 0.00318  | 0.056 |
| DSG2           | 0.238  | 0.299 | 0.00993  | 0.061 |
| EEF1A1P11      | 3.79   | 3.889 | 0.01709  | 0.099 |
| EEF1A1P14      | 1.133  | 1.185 | 0.01617  | 0.052 |
| EEF1A1P4       | 0.838  | 0.897 | 0.01058  | 0.059 |
| EEF1A1P8       | 0.818  | 0.868 | 0.02288  | 0.05  |
| EFEMP1         | 0.31   | 0.231 | 0.01154  | 0.079 |
| ELOVL2         | 0.315  | 0.248 | 0.01196  | 0.067 |
| ELOVL5         | 0.901  | 0.985 | 0.02188  | 0.084 |
| EMP1           | 0.339  | 0.235 | 0.00528  | 0.104 |
| EPCAM          | 0.597  | 0.717 | 0.00322  | 0.12  |
| F5             | 0.03   | 0.111 | 0.00661  | 0.081 |
| FAM103A1       | 0.876  | 0.995 | 0.00018  | 0.119 |
| FAM21C         | 0.665  | 0.742 | 0.00234  | 0.077 |
| FAR2P1         | 0.802  | 0.581 | 0.00192  | 0.221 |
| FAR2P2         | 0.866  | 0.657 | 0.00613  | 0.209 |
| FAR2P4         | 0.86   | 0.706 | 0.00739  | 0.154 |

|            |       |        |          |       |
|------------|-------|--------|----------|-------|
| FNIP2      | 0.267 | 0.334  | 0.01628  | 0.067 |
| FOS        | 2.402 | 2.015  | 0.02288  | 0.387 |
| FZD4       | 0.258 | 0.331  | 0.00874  | 0.073 |
| GABPB1.AS1 | 0.293 | 0.368  | 0.00266  | 0.075 |
| GADD45B    | 0.986 | 0.862  | 0.00494  | 0.124 |
| GCNT1      | 0.435 | 0.592  | 0.00201  | 0.157 |
| GHR        | 0.171 | 0.243  | 0.00494  | 0.072 |
| GLMP       | 0.351 | 0.403  | 0.02148  | 0.052 |
| GLO1       | 0.824 | 0.99   | 0.00897  | 0.166 |
| GLYATL1P4  | 0.344 | 0.485  | 0.0119   | 0.141 |
| GNB2L1     | 1.094 | 1.154  | 0.01611  | 0.06  |
| GPR160     | 0.383 | 0.463  | 0.02427  | 0.08  |
| GREB1      | 0.614 | 0.459  | 0.00529  | 0.155 |
| GUCY1A3    | 0.949 | 1.099  | 0.00042  | 0.15  |
| GUSBP3     | 2.003 | 2.248  | 0.00412  | 0.245 |
| HECTD4     | 0.461 | 0.515  | 0.01714  | 0.054 |
| HERC2P2    | 0.82  | 1.02   | 2.34E-07 | 0.2   |
| HERC2P3    | 0.631 | 0.758  | 0.00042  | 0.127 |
| HERC2P9    | 0.416 | 0.516  | 0.00125  | 0.1   |
| HES1       | 0.341 | 0.422  | 0.01734  | 0.081 |
| HOMER2     | 0.625 | 0.697  | 0.01412  | 0.072 |
| IGF1       | 0.731 | 0.544  | 0.00229  | 0.187 |
| IQGAP1     | 0.573 | 0.501  | 0.00644  | 0.072 |
| ITM2C      | 0.546 | 0.478  | 0.02148  | 0.068 |
| KCNC2      | 0.178 | 0.25   | 0.01299  | 0.072 |
| KCNH8      | 0.025 | 0.092  | 4.24E-05 | 0.067 |
| KCNN4      | 0.118 | 0.187  | 0.00092  | 0.069 |
| KIAA1244   | 0.692 | 0.84   | 0.00042  | 0.148 |
| KIAA1324   | 0.544 | 0.614  | 0.0236   | 0.07  |
| KLF4       | 0.536 | 0.417  | 0.0025   | 0.119 |
| LGALS3     | 0.474 | 0.421  | 0.01611  | 0.053 |
| LINC00665  | 0.19  | 0.251  | 0.01641  | 0.061 |
| LINC00920  | 0.016 | 0.087  | 0.00412  | 0.071 |
| LINC01088  | 0.337 | 0.25   | 0.00494  | 0.087 |
| LINC01089  | 0.803 | 0.862  | 0.01449  | 0.059 |
| LPHN2      | 0.463 | 0.378  | 0.01511  | 0.085 |
| LRG1       | 0.425 | 0.344  | 0.00482  | 0.081 |
| LRRC37A    | 0.994 | 1.182  | 5.24E-07 | 0.188 |
| LRRC37A3   | 0.777 | 0.887  | 0.00067  | 0.11  |
| LSAMP.AS1  | 0.077 | 0.014  | 0.01997  | 0.063 |
| MAGEH1     | 0.366 | 0.285  | 0.01196  | 0.081 |
| MAP1LC3B   | 0.337 | 0.264  | 4.98E-05 | 0.073 |
| MAP1LC3BP1 | 0.069 | -0.033 | 2.03E-07 | 0.102 |
| MAP2       | 0.27  | 0.197  | 0.02485  | 0.073 |
| MAP7       | 0.429 | 0.522  | 0.00036  | 0.093 |
| MAPK6      | 0.442 | 0.5    | 0.01819  | 0.058 |
| MARVELD2   | 0.174 | 0.252  | 0.00125  | 0.078 |
| METTL7A    | 1.105 | 1.018  | 0.00172  | 0.087 |
| MGST2      | 0.585 | 0.666  | 0.01873  | 0.081 |
| MIPEP      | 0.579 | 0.333  | 0.00015  | 0.246 |
| MPP5       | 0.478 | 0.532  | 0.00475  | 0.054 |

|               |        |        |          |       |
|---------------|--------|--------|----------|-------|
| MT1A          | 0.594  | 0.423  | 0.00529  | 0.171 |
| MT1E          | 0.817  | 0.645  | 0.00173  | 0.172 |
| MT1G          | 0.628  | 0.494  | 0.0227   | 0.134 |
| MT1L          | 1.48   | 1.088  | 0.00034  | 0.392 |
| MT1M          | 0.604  | 0.518  | 0.00525  | 0.086 |
| MT1X          | 0.516  | 0.409  | 0.0074   | 0.107 |
| MT2A          | 1.559  | 1.398  | 0.00229  | 0.161 |
| MTND5P11      | 1.225  | 1.134  | 0.01105  | 0.091 |
| MYADM         | 1.168  | 1.021  | 0.00054  | 0.147 |
| NAALADL2      | 0.285  | 0.381  | 0.0011   | 0.096 |
| NBL1          | 0.464  | 0.396  | 0.00377  | 0.068 |
| NCALD         | 0.104  | 0.176  | 0.00023  | 0.072 |
| NCAPD3        | 1.046  | 0.776  | 0.01901  | 0.27  |
| NDRG1         | 0.866  | 0.992  | 0.00907  | 0.126 |
| NEAT1         | 3.737  | 3.874  | 0.00145  | 0.137 |
| NKAIN1        | -0.108 | -0.055 | 0.00038  | 0.053 |
| NME2P1        | 1.91   | 2.078  | 0.00203  | 0.168 |
| NPIP7         | 0.656  | 0.516  | 8.16E-08 | 0.14  |
| NPIPP1        | 2.246  | 2.325  | 0.01376  | 0.079 |
| NPM1P8        | 1.257  | 1.335  | 0.01912  | 0.078 |
| NPNT          | 0.62   | 0.501  | 0.00287  | 0.119 |
| NRGN          | 0.422  | 0.371  | 0.01581  | 0.051 |
| OPHN1         | 0.493  | 0.369  | 8.16E-08 | 0.124 |
| OR11H2        | 0.169  | 0.109  | 0.00529  | 0.06  |
| OR11J5P       | -0.034 | -0.107 | 0.00978  | 0.073 |
| OR4K7P        | 0.075  | 0.022  | 0.01387  | 0.053 |
| OR7E86P       | -0.043 | 0.013  | 0.01511  | 0.056 |
| P3H2          | 0.139  | 0.016  | 0.00101  | 0.123 |
| PABPC1L2A     | 0.158  | 0.247  | 0.00023  | 0.089 |
| PABPC1L2B.AS1 | 1.549  | 1.944  | 0.00036  | 0.395 |
| PCAT14        | 1.749  | 2.397  | 0.00177  | 0.648 |
| PCAT18        | 0.361  | 0.548  | 0.01221  | 0.187 |
| PCAT4         | 0.717  | 0.322  | 0.00897  | 0.395 |
| PCGF3         | 0.441  | 0.495  | 0.00371  | 0.054 |
| PCMTD1        | 0.589  | 0.659  | 0.02126  | 0.07  |
| PCMTD2        | 0.392  | 0.455  | 0.00138  | 0.063 |
| PDE3B         | 0.311  | 0.424  | 0.0009   | 0.113 |
| PDE9A         | 0.401  | 0.469  | 0.01581  | 0.068 |
| PGM5P4.AS1    | 0.315  | 0.223  | 0.0068   | 0.092 |
| PITPNC1       | 0.216  | 0.153  | 0.00145  | 0.063 |
| PLA2G7        | 0.363  | 0.571  | 1.09E-05 | 0.208 |
| POTEB2        | 0.584  | 0.42   | 0.00494  | 0.164 |
| POTEE         | 0.837  | 0.661  | 0.01648  | 0.176 |
| POTEF         | 1.478  | 1.141  | 0.00929  | 0.337 |
| POTEI         | 0.926  | 0.762  | 0.02154  | 0.164 |
| PPM1H         | 0.37   | 0.427  | 0.00077  | 0.057 |
| PRIM2         | 0.109  | 0.058  | 0.00482  | 0.051 |
| PTP4A2        | 1.001  | 0.935  | 0.02485  | 0.066 |
| PWAR6         | 1.949  | 2.136  | 0.00055  | 0.187 |
| RAB27A        | 0.521  | 0.438  | 0.0079   | 0.083 |
| RAB3B         | 1.027  | 1.278  | 3.00E-05 | 0.251 |

|                |        |        |          |       |
|----------------|--------|--------|----------|-------|
| RABEP1         | 0.649  | 0.729  | 0.0054   | 0.08  |
| RAD51AP1P1     | 0.207  | 0.259  | 0.01501  | 0.052 |
| RALGAPA2       | 0.678  | 0.831  | 0.00125  | 0.153 |
| REXO2          | 0.229  | 0.337  | 0.00036  | 0.108 |
| RHOB           | 0.671  | 0.583  | 0.00369  | 0.088 |
| RLN1           | 0.285  | 0.025  | 2.27E-05 | 0.26  |
| RLN2           | 0.009  | -0.149 | 0.00034  | 0.158 |
| RN7SKP264      | -0.147 | -0.083 | 0.02276  | 0.064 |
| RNASE4         | 0.339  | 0.26   | 0.0033   | 0.079 |
| RNU4.46P       | 0.805  | 0.883  | 0.01049  | 0.078 |
| RNU6.321P      | 1.327  | 1.007  | 0.00173  | 0.32  |
| RP1.207H1.3    | 0.212  | 0.313  | 0.00562  | 0.101 |
| RP11.1023L17.1 | 1.27   | 1.491  | 1.87E-05 | 0.221 |
| RP11.1084J3.3  | 0.287  | 0.458  | 0.00158  | 0.171 |
| RP11.1085N6.1  | 0.856  | 0.916  | 0.01581  | 0.06  |
| RP11.1319K7.1  | 0.44   | 0.573  | 4.87E-05 | 0.133 |
| RP11.135A1.2   | 0.371  | 0.505  | 0.00494  | 0.134 |
| RP11.1415C14.3 | 1.557  | 1.843  | 0.0033   | 0.286 |
| RP11.147L13.7  | 0.545  | 0.604  | 0.01668  | 0.059 |
| RP11.159H20.3  | 0.176  | 0.23   | 0.00535  | 0.054 |
| RP11.15I11.2   | 0.886  | 0.982  | 0.00843  | 0.096 |
| RP11.170M17.2  | 1.62   | 1.69   | 0.01848  | 0.07  |
| RP11.173P15.3  | 2.396  | 2.614  | 0.01015  | 0.218 |
| RP11.177A2.5   | 1.326  | 1.133  | 1.94E-05 | 0.193 |
| RP11.191L9.4   | -0.074 | -0.009 | 0.00077  | 0.065 |
| RP11.20B24.5   | 0.591  | 0.682  | 0.01477  | 0.091 |
| RP11.220D10.1  | 0.784  | 0.928  | 0.01105  | 0.144 |
| RP11.23J9.6    | 0.119  | 0.206  | 0.0105   | 0.087 |
| RP11.253E3.1   | 0.594  | 0.66   | 0.00616  | 0.066 |
| RP11.258C19.7  | 1.071  | 1.257  | 0.00123  | 0.186 |
| RP11.307O1.1   | 2.345  | 2.573  | 0.00838  | 0.228 |
| RP11.327O17.2  | 0.371  | 0.511  | 0.01289  | 0.14  |
| RP11.332O19.2  | 3.075  | 3.279  | 0.02427  | 0.204 |
| RP11.34P13.13  | 0.922  | 0.991  | 0.01715  | 0.069 |
| RP11.408P14.1  | 3.028  | 3.12   | 0.02035  | 0.092 |
| RP11.433O3.1   | 2.552  | 2.957  | 0.00221  | 0.405 |
| RP11.459I19.1  | 0.249  | 0.157  | 0.01118  | 0.092 |
| RP11.483P21.2  | 0.738  | 0.867  | 0.00538  | 0.129 |
| RP11.486P11.1  | 0.196  | 0.106  | 0.01808  | 0.09  |
| RP11.488C13.1  | 1.779  | 1.883  | 0.0014   | 0.104 |
| RP11.490G8.1   | 0.789  | 0.891  | 0.00691  | 0.102 |
| RP11.498C9.4   | 0.281  | 0.429  | 0.01267  | 0.148 |
| RP11.536C10.19 | 2.185  | 1.523  | 0.00215  | 0.662 |
| RP11.536C10.25 | 0.216  | 0.032  | 0.00499  | 0.184 |
| RP11.546B8.5   | 0.125  | 0.511  | 9.05E-23 | 0.386 |
| RP11.553N16.1  | 2.205  | 2.305  | 0.0092   | 0.1   |
| RP11.586K12.5  | 0.324  | 0.185  | 0.02044  | 0.139 |
| RP11.588K22.2  | 0.607  | 0.736  | 0.00211  | 0.129 |
| RP11.597D13.8  | -0.086 | 0.011  | 0.01553  | 0.097 |
| RP11.597D13.9  | 0.082  | 0.201  | 7.62E-09 | 0.119 |
| RP11.627K11.1  | 2.658  | 2.748  | 0.00929  | 0.09  |

|                |       |        |          |       |
|----------------|-------|--------|----------|-------|
| RP11.64K7.1    | 0.884 | 1.095  | 0.01728  | 0.211 |
| RP11.69L16.5   | 0.861 | 0.938  | 0.0236   | 0.077 |
| RP11.69M1.4    | 1.964 | 2.183  | 0.00034  | 0.219 |
| RP11.706O15.3  | 0.213 | 0.322  | 0.00111  | 0.109 |
| RP11.706O15.7  | 0.914 | 1.085  | 0.02105  | 0.171 |
| RP11.710F7.2   | 0.696 | 0.58   | 0.02387  | 0.116 |
| RP11.744O11.2  | 0.525 | 0.768  | 0.0128   | 0.243 |
| RP11.798G7.4   | 0.759 | 0.957  | 0.0002   | 0.198 |
| RP11.798G7.7   | 1.265 | 1.597  | 8.23E-07 | 0.332 |
| RP11.810K23.10 | 0.086 | -0.059 | 0.00369  | 0.145 |
| RP11.81K13.1   | 0.172 | 0.248  | 0.00448  | 0.076 |
| RP11.849F2.7   | 0.69  | 0.755  | 0.00959  | 0.065 |
| RP11.884K10.6  | 0.322 | 0.444  | 0.01376  | 0.122 |
| RP11.903H12.5  | 0.617 | 0.527  | 0.01147  | 0.09  |
| RP11.927P21.2  | 0.595 | 0.743  | 0.00079  | 0.148 |
| RP3.325F22.5   | 0.07  | 0.159  | 0.00101  | 0.089 |
| RP3.406A7.5    | 1.007 | 1.147  | 0.00582  | 0.14  |
| RP3.508I15.22  | 0.418 | 0.291  | 0.00658  | 0.127 |
| RP5.1007F24.1  | 0.081 | 0.174  | 0.00322  | 0.093 |
| RP6.109B7.4    | 0.207 | 0.32   | 0.00211  | 0.113 |
| RPL10          | 0.563 | 0.624  | 0.00034  | 0.061 |
| RPL11          | 3.367 | 3.48   | 0.00849  | 0.113 |
| RPL13A         | 0.811 | 0.864  | 0.02146  | 0.053 |
| RPL22          | 1.502 | 1.56   | 0.01342  | 0.058 |
| RPL23AP81      | 0.71  | 0.788  | 0.01304  | 0.078 |
| RPL34          | 1.012 | 1.086  | 0.0015   | 0.074 |
| RPL41          | 0.87  | 0.99   | 0.00278  | 0.12  |
| RPL5           | 1.425 | 1.484  | 0.01671  | 0.059 |
| RPL5P4         | 1.701 | 1.797  | 0.00017  | 0.096 |
| RPL6           | 1.48  | 1.56   | 0.00754  | 0.08  |
| RPL6P27        | 2.486 | 2.649  | 0.00168  | 0.163 |
| RPL7A          | 0.503 | 0.554  | 0.01504  | 0.051 |
| RPL7P11        | 2.329 | 2.449  | 0.01334  | 0.12  |
| RPL7P9         | 2.9   | 3.033  | 0.02387  | 0.133 |
| RPL9P3         | 0.427 | 0.488  | 0.00318  | 0.061 |
| RPL9P32        | 0.807 | 0.898  | 0.00814  | 0.091 |
| RPS12          | 1.724 | 1.846  | 0.00528  | 0.122 |
| RPS15A         | 0.617 | 0.673  | 0.00613  | 0.056 |
| RPS15AP1       | 1.64  | 1.792  | 0.02188  | 0.152 |
| RPS15AP11      | 2.239 | 2.337  | 0.01617  | 0.098 |
| RPS17P8        | 0     | -0.128 | 0.00898  | 0.128 |
| RPS23          | 1.262 | 1.319  | 0.00212  | 0.057 |
| RPS25          | 2.045 | 2.138  | 0.02282  | 0.093 |
| RPS3           | 1.597 | 1.665  | 0.02279  | 0.068 |
| RPS3AP47       | 1.581 | 1.718  | 0.01709  | 0.137 |
| RPS3AP5        | 2.541 | 2.689  | 0.01155  | 0.148 |
| RPS3AP6        | 2.648 | 2.805  | 0.00482  | 0.157 |
| RPS4XP13       | 0.888 | 0.952  | 0.00351  | 0.064 |
| RPS7P1         | 2.758 | 2.885  | 0.02387  | 0.127 |
| RPS7P11        | 1.876 | 2.008  | 0.02387  | 0.132 |
| RPS7P3         | 2.293 | 2.399  | 0.00795  | 0.106 |

|                        |        |        |          |       |
|------------------------|--------|--------|----------|-------|
| S100A6                 | 0.145  | 0.056  | 0.00238  | 0.089 |
| SCGB1D1                | 0.357  | 0.261  | 0.01671  | 0.096 |
| SCIN                   | 0.061  | -0.004 | 0.00024  | 0.065 |
| SEC11C                 | 0.661  | 0.823  | 0.00644  | 0.162 |
| SEPP1                  | 1.32   | 1.184  | 0.01376  | 0.136 |
| SEPT9                  | 0.253  | 0.303  | 0.00322  | 0.05  |
| SERBP1P6               | 0.494  | 0.565  | 0.00115  | 0.071 |
| SH3RF1                 | 0.583  | 0.73   | 0.00029  | 0.147 |
| SLC25A5                | 0.575  | 0.644  | 0.00253  | 0.069 |
| SLC41A1                | 0.236  | 0.185  | 0.00217  | 0.051 |
| SLC5A4                 | -0.003 | 0.057  | 0.00601  | 0.06  |
| SNHG5                  | 0.311  | 0.367  | 0.00322  | 0.056 |
| SNHG8                  | 0.516  | 0.624  | 0.00142  | 0.108 |
| SNORD115.27            | 0.265  | 0.355  | 0.01848  | 0.09  |
| SNORD115.3             | 0.613  | 0.735  | 0.00658  | 0.122 |
| SNORD115.31            | 0.304  | 0.418  | 0.0227   | 0.114 |
| SNORD115.32            | 0.405  | 0.653  | 0.00125  | 0.248 |
| SNORD115.5             | 0.601  | 0.72   | 0.01639  | 0.119 |
| SNORD32B               | 1.325  | 1.458  | 0.02476  | 0.133 |
| SNORD36B               | 1.328  | 1.485  | 0.00695  | 0.157 |
| snoU2.30               | 2.872  | 3.012  | 0.00322  | 0.14  |
| SORL1                  | 0.238  | 0.313  | 0.00518  | 0.075 |
| SPARCL1                | 1.612  | 1.414  | 0.01387  | 0.198 |
| SPG20                  | 0.303  | 0.23   | 0.00101  | 0.073 |
| SRGN                   | 0.981  | 0.809  | 0.00895  | 0.172 |
| STAG3L5P.PVRIG2P.PILRB | 0.71   | 0.787  | 0.00726  | 0.077 |
| STEAP4                 | 0.657  | 0.846  | 0.01049  | 0.189 |
| STXBP6                 | 0.153  | 0.094  | 0.00297  | 0.059 |
| SYNJ2BP                | 0.478  | 0.582  | 0.0022   | 0.104 |
| TBC1D3I                | 0.266  | 0.349  | 0.00125  | 0.083 |
| TDRD1                  | 0.02   | 0.164  | 0.00838  | 0.144 |
| TENM1                  | 0.491  | 0.231  | 0.00317  | 0.26  |
| TFF3                   | 0.573  | 0.464  | 0.00119  | 0.109 |
| TGFB3                  | 0.333  | 0.263  | 0.01576  | 0.07  |
| TGFBRAP1               | 0.414  | 0.471  | 0.01387  | 0.057 |
| TIMP3                  | 0.677  | 0.623  | 0.02146  | 0.054 |
| TMC5                   | 0.425  | 0.572  | 0.00163  | 0.147 |
| TMEM144                | 0.121  | 0.183  | 8.23E-07 | 0.062 |
| TMEM178A               | 0.204  | 0.255  | 0.01355  | 0.051 |
| TPT1                   | 1.595  | 1.671  | 0.01162  | 0.076 |
| TTN                    | 0.158  | 0.104  | 0.00021  | 0.054 |
| TXLNGY                 | 0.383  | 0.503  | 0.00211  | 0.12  |
| UBE2Q2P6               | 3.715  | 3.812  | 0.00859  | 0.097 |
| UPK3A                  | 0.126  | 0.062  | 0.0105   | 0.064 |
| UPK3BL                 | 1.908  | 1.651  | 0.00085  | 0.257 |
| VGLL3                  | 0.384  | 0.223  | 0.00497  | 0.161 |
| VPS13A                 | 0.411  | 0.48   | 0.00739  | 0.069 |
| VSIG2                  | 0.227  | 0.157  | 0.00371  | 0.07  |
| XXbac.BPGBPG55C20.2    | 2.132  | 2.345  | 0.00125  | 0.213 |
| ZNF121                 | 1.227  | 1.304  | 0.00722  | 0.077 |
| ZNF260                 | 0.257  | 0.315  | 0.02148  | 0.058 |

|        |       |       |         |       |
|--------|-------|-------|---------|-------|
| ZNF350 | 0.576 | 0.676 | 0.00929 | 0.1   |
| ZNF404 | 0.153 | 0.21  | 0.0222  | 0.057 |
| ZNF577 | 0.815 | 0.897 | 0.01611 | 0.082 |
| ZNF587 | 1.378 | 1.498 | 0.00045 | 0.12  |
| ZNF614 | 0.196 | 0.264 | 0.00377 | 0.068 |
| ZNF615 | 0.395 | 0.483 | 0.01561 | 0.088 |
| ZNF765 | 0.173 | 0.239 | 0.00234 | 0.066 |
| ZNF814 | 0.659 | 0.73  | 0.00234 | 0.071 |

*362 ETS dependent race specific genes are selected by  $q \leq 0.025$  &  $\log_2 FC \geq 0.05$*

***Bold** indicates previously published genes that show differences in expression pattern in AAM*

Supplementary table 2.
