# Supplementary material
Source: PubMed Central journal article supplement (PMC7882398)
Supplement: NIHMS1653074-supplement-Supplementary_Table_3.pdf [file NIHMS1653074-supplement-Supplementary_Table_3.pdf]

| Gene Symbol    | African American              |                              |           | European American             |                              |           |
|----------------|-------------------------------|------------------------------|-----------|-------------------------------|------------------------------|-----------|
|                | BCR_5year_Yes<br>(Median Exp) | BCR_5year_No<br>(Median Exp) | <i>p</i>  | BCR_5year_Yes<br>(Median Exp) | BCR_5year_No<br>(Median Exp) | <i>p</i>  |
| <b>TIMP3</b>   | 0.776086803                   | 0.588267024                  | 0.0268555 | 0.598224479                   | 0.633173038                  | 0.6349904 |
| <b>SRGN</b>    | 1.069170307                   | 0.768577806                  | 0.0019347 | 0.7782487                     | 0.832688997                  | 0.2155137 |
| <b>MYADM</b>   | 1.273571981                   | 1.025988416                  | 0.0031022 | 1.019531263                   | 1.029842557                  | 0.3800725 |
| <b>EMP1</b>    | 0.406087747                   | 0.201772453                  | 0.024495  | 0.223347694                   | 0.243386084                  | 0.5626934 |
| <b>BCL6</b>    | 0.396220001                   | 0.331449641                  | 0.0433817 | 0.282981209                   | 0.273070574                  | 0.9078355 |
| <b>APOD</b>    | 1.642712272                   | 1.328536887                  | 0.0130052 | 1.268967165                   | 1.392819576                  | 0.1105661 |
| VSIG2          | 0.224767057                   | 0.232747543                  | 0.9208643 | 0.127674586                   | 0.163428474                  | 0.0679476 |
| VGLL3          | 0.351089502                   | 0.503666911                  | 0.1486477 | 0.176779863                   | 0.265180414                  | 0.0003408 |
| UPK3BL         | 1.925123621                   | 1.830339784                  | 0.3368862 | 1.638356796                   | 1.662699316                  | 0.8378951 |
| UPK3A          | 0.144442656                   | 0.105097807                  | 0.2612831 | 0.055263695                   | 0.068682242                  | 0.5610412 |
| TGFB3          | 0.321750419                   | 0.339085004                  | 0.4312124 | 0.237557218                   | 0.270243698                  | 0.1994007 |
| SPG20          | 0.307499038                   | 0.274772183                  | 0.3794979 | 0.203864596                   | 0.242983135                  | 0.024576  |
| SPARCL1        | 1.675059182                   | 1.469503558                  | 0.1335198 | 1.349879886                   | 1.445481133                  | 0.1764186 |
| SEPP1          | 1.314947294                   | 1.327938911                  | 0.7617909 | 1.183490102                   | 1.185438362                  | 0.8556432 |
| S100A6         | 0.12288411                    | 0.164658429                  | 0.8206488 | 0.035717498                   | 0.068330838                  | 0.3837406 |
| RP11.903H12.5  | 0.618918624                   | 0.598638672                  | 0.4585315 | 0.510403209                   | 0.537800858                  | 0.7865906 |
| RP11.810K23.10 | 0.113899147                   | 0.059093685                  | 0.9979675 | -0.075623755                  | -0.032888853                 | 0.2242633 |
| RP11.586K12.5  | 0.338579767                   | 0.291167382                  | 0.8285814 | 0.134666478                   | 0.221407336                  | 0.0667554 |
| RP11.536C10.25 | 0.253820932                   | 0.126645843                  | 0.316782  | -0.001030354                  | 0.047711118                  | 0.0750716 |
| RP11.536C10.19 | 2.156823445                   | 2.241367897                  | 0.8206488 | 1.408525278                   | 1.589149646                  | 0.0900974 |
| RNU6.321P      | 1.381000152                   | 1.327119958                  | 0.5292276 | 0.886303933                   | 1.073314086                  | 0.0114537 |
| RNASE4         | 0.340900093                   | 0.313641876                  | 0.5225792 | 0.270253883                   | 0.255742787                  | 0.9570124 |
| RHOB           | 0.679134625                   | 0.657060076                  | 0.6817202 | 0.559070225                   | 0.601892195                  | 0.0559119 |
| RAB27A         | 0.54788059                    | 0.4887845                    | 0.7969639 | 0.415809362                   | 0.44878719                   | 0.0268493 |
| POTEI          | 0.919939237                   | 0.950156801                  | 0.3685459 | 0.707222422                   | 0.783071847                  | 0.0352667 |
| POTEF          | 1.387772912                   | 1.526104141                  | 0.5359188 | 1.120260324                   | 1.16005304                   | 0.0403493 |
| POTEE          | 0.832961207                   | 0.845048956                  | 0.5631025 | 0.570740157                   | 0.695462208                  | 0.0077097 |
| POTEB2         | 0.587330018                   | 0.583787524                  | 0.8966354 | 0.371839385                   | 0.43942356                   | 0.0175294 |
| PITPNC1        | 0.21777723                    | 0.202077233                  | 0.6411026 | 0.114352478                   | 0.173650637                  | 2.47E-05  |
| PGM5P4.AS1     | 0.305867826                   | 0.319582775                  | 0.6854611 | 0.161353175                   | 0.256173328                  | 3.12E-05  |
| PCAT4          | 0.649436896                   | 0.743588284                  | 0.2342061 | 0.187520907                   | 0.390480279                  | 0.0004117 |
| OR11J5P        | -0.050687596                  | -0.001419842                 | 0.9047021 | -0.12090971                   | -0.095673222                 | 0.0984083 |
| OR11H2         | 0.174031815                   | 0.161772571                  | 0.8048393 | 0.104463683                   | 0.112783808                  | 0.1172896 |
| NBL1           | 0.484836474                   | 0.448371012                  | 0.1574333 | 0.379279163                   | 0.408690876                  | 0.0488484 |
| MTND5P11       | 1.208586695                   | 1.287451221                  | 0.4647316 | 1.111834375                   | 1.153540274                  | 0.2440022 |
| MT2A           | 1.61711911                    | 1.472900255                  | 0.2927817 | 1.343634546                   | 1.424238981                  | 0.0475982 |
| MT1X           | 0.52021229                    | 0.445793846                  | 0.6854611 | 0.396618525                   | 0.418649211                  | 0.0167592 |
| MT1M           | 0.688950754                   | 0.544303459                  | 0.2382372 | 0.425679146                   | 0.556621878                  | 0.0003059 |
| MT1L           | 1.494571432                   | 1.31653779                   | 0.6015321 | 1.026491401                   | 1.152573994                  | 0.0229086 |
| MT1G           | 0.64905865                    | 0.613123758                  | 0.5909345 | 0.425039724                   | 0.578713593                  | 0.0023561 |
| MT1E           | 0.808529256                   | 0.817294702                  | 0.3850481 | 0.599552025                   | 0.705714629                  | 0.0038382 |
| MT1A           | 0.614167421                   | 0.5438298                    | 0.064041  | 0.402825051                   | 0.4529352                    | 0.0149748 |
| METTL7A        | 1.103090806                   | 1.11095947                   | 0.8684913 | 0.995939094                   | 1.020051166                  | 0.3183669 |
| LSAMP.AS1      | 0.055563077                   | 0.10473882                   | 0.7734646 | 4.35E-05                      | 0.032723505                  | 0.1706117 |

|               |             |             |           |              |             |           |
|---------------|-------------|-------------|-----------|--------------|-------------|-----------|
| LSAMP         | 0.23342009  | 0.217409562 | 0.7969639 | 0.131190644  | 0.157424351 | 0.3380604 |
| LPHN2         | 0.471256065 | 0.420212329 | 0.6193827 | 0.374040759  | 0.38677019  | 0.2662452 |
| LINC01088     | 0.327746308 | 0.368670103 | 0.4804339 | 0.220865611  | 0.272910566 | 0.0051022 |
| LGALS3        | 0.471859809 | 0.488320824 | 0.5061478 | 0.409956471  | 0.426388201 | 0.2263723 |
| KLF4          | 0.557326249 | 0.458452265 | 0.0836976 | 0.394224108  | 0.441038078 | 0.0204584 |
| ITM2C         | 0.5612491   | 0.514699085 | 0.2342061 | 0.454812996  | 0.491442598 | 0.0387631 |
| IQGAP1        | 0.593739163 | 0.524543432 | 0.0741536 | 0.491997736  | 0.504936254 | 0.8207053 |
| IGF1          | 0.704288971 | 0.77277851  | 0.8684913 | 0.453231698  | 0.594494788 | 0.0067064 |
| GREB1         | 0.649010844 | 0.593778623 | 0.9208643 | 0.402070103  | 0.496994442 | 0.0006795 |
| GADD45B       | 1.021216438 | 0.911284615 | 0.2147758 | 0.836403597  | 0.885529511 | 0.0652224 |
| FOS           | 2.521426417 | 2.06271897  | 0.0121039 | 1.8809039    | 2.099033469 | 0.0022117 |
| FAR2P4        | 0.82235386  | 0.862728337 | 0.3822668 | 0.660551351  | 0.74050352  | 0.0205585 |
| EFEMP1        | 0.312063294 | 0.309595671 | 0.4554489 | 0.217112937  | 0.234206321 | 0.6968529 |
| DSCAM.AS1     | 0.066555249 | 0.04749929  | 0.6447533 | -0.010767718 | 0.011756474 | 0.0469833 |
| CTD.2653B5.1  | 0.379384636 | 0.385836077 | 0.8484878 | 0.289647519  | 0.310683942 | 0.511414  |
| CTD.2311B13.5 | 1.979670396 | 1.934640747 | 0.6157941 | 1.392082692  | 1.661067408 | 0.0017441 |
| CTD.2031P19.5 | 1.301158521 | 1.16296708  | 0.0584043 | 1.134571884  | 1.184260819 | 0.0125791 |
| CTBP1.AS      | 0.323021417 | 0.381951276 | 0.4282363 | 0.253677108  | 0.27999602  | 0.0519469 |
| CRYAB         | 0.808081551 | 0.758309426 | 0.4372004 | 0.701672268  | 0.757451713 | 0.2081172 |
| COL14A1       | 0.314972766 | 0.265618142 | 0.7617909 | 0.20951837   | 0.242965868 | 0.1670089 |
| CNTNAP2       | 0.13284467  | 0.126341746 | 0.4964211 | 0.05655191   | 0.080508857 | 0.0740746 |
| CLU           | 0.495794109 | 0.448251522 | 0.1844596 | 0.376928683  | 0.428630801 | 0.077509  |
| CHRD1         | 0.216059282 | 0.230730406 | 0.9249102 | 0.115706868  | 0.183504052 | 0.0029    |
| CFD           | 0.994966521 | 0.933047665 | 0.5596685 | 0.786237409  | 0.87886861  | 0.0005447 |
| CDKN1A        | 0.150247455 | 0.06520908  | 0.154462  | 0.038040151  | 0.060546936 | 0.1315389 |
| CDC42EP5      | 0.831153149 | 0.877238768 | 0.3739971 | 0.711811314  | 0.810493459 | 1.39E-06  |
| CCL3          | 0.390068489 | 0.334662228 | 0.1861502 | 0.236503015  | 0.249318718 | 0.2405484 |
| CCDC80        | 0.402765217 | 0.4292709   | 0.8725026 | 0.31725576   | 0.328788491 | 0.2873408 |
| C1QTNF9B      | 0.179587689 | 0.143237487 | 0.9857735 | 0.008077379  | 0.065713581 | 0.0005373 |
| bP.2189O9.2   | 0.48719695  | 0.491767179 | 0.9939027 | 0.35571156   | 0.372538512 | 0.2918038 |
| BDH2          | 0.235212718 | 0.195718728 | 0.1172093 | 0.162592009  | 0.163904801 | 0.7965016 |
| BAG3          | 0.514369129 | 0.485306958 | 0.5359188 | 0.443316674  | 0.444431362 | 0.9960902 |
| ATAD1         | 0.574165107 | 0.48845292  | 0.2224037 | 0.46066162   | 0.478403506 | 0.0939989 |
| ARHGEF7       | 0.461302064 | 0.417538492 | 0.3118815 | 0.383267064  | 0.41601488  | 0.0029174 |
| AKAP12        | 0.36777825  | 0.30456884  | 0.1878523 | 0.279549968  | 0.257840333 | 0.396237  |
| ADD3          | 0.272469623 | 0.231770914 | 0.1443977 | 0.203907282  | 0.190515148 | 0.7164306 |
| ADAMTS1       | 0.647471684 | 0.509881402 | 0.1014383 | 0.442974556  | 0.448317038 | 0.8126172 |

**Italic** indicated the final genes panel

Supplementary table 3.
